# Supplementary material for: High-Fat High-Sugar Diet-Induced Changes in the Lipid Metabolism Are Associated with Mildly Increased COVID-19 Severity and Delayed Recovery in the Syrian Hamster
Source: MDPI journal article supplement (doi:10.3390/v13122506), 2021-12-14
Supplement: s1 [file s1]

**Table S1. Liver marker profile in serum of regular diet (RD) and high-fat high-sugar diet (HFHS) after 16 weeks.** Quantitative determination of total cholesterol (CHOL), high-density lipoprotein cholesterol (HDL), triglycerides (TRIG), alanine aminotransferase (ALT), aspartate aminotransferase (AST), and glucose (GLU) in heparinized whole blood. From the CHOL, HDL and TRIG determinations, low-density lipoprotein cholesterol (LDL), very low-density lipoprotein cholesterol (VLDL), non-HDL cholesterol, and a total cholesterol/high-density lipoprotein cholesterol ratio (TC/H) was calculated. ~~~ could not be calculated, LIP = not detectable due to lipid interference.

| Animal ID  | Chol<br>mg/dl | HDL<br>mg/dl | Trig<br>mg/dl | ALT<br>U/L | AST<br>U/L | GLU<br>mg/dl | nHDLc<br>mg/dl | TC/H | LDL<br>mg/dl | VLDL<br>mg/dl | LIP |
|------------|---------------|--------------|---------------|------------|------------|--------------|----------------|------|--------------|---------------|-----|
| HFHS.1     | 360           | LIP          | ~~~           | 124        | 78         | 120          | ~~~            | ~~~  | LIP          | LIP           | 3   |
| HFHS.2     | >520          | HEM          | HEM           | 224        | HEM        | LIP          | ~~~            | ~~~  | ~~~          | ~~~           | 3   |
| HFHS.3     | ~~~           | HEM          | ~~~           | 140        | HEM        | LIP          | ~~~            | ~~~  | ~~~          | ~~~           | 3   |
| HFHS.4     | >520          | HEM          | HEM           | 190        | HEM        | LIP          | ~~~            | ~~~  | ~~~          | ~~~           | 3   |
| HFHS.5     | 380           | LIP          | >500          | 117        | 82         | 114          | ~~~            | ~~~  | LIP          | LIP           | 3   |
| HFHS.6     | 263           | LIP          | >500          | 152        | 86         | 110          | ~~~            | ~~~  | LIP          | LIP           | 3   |
| HFHS.7     | 384           | ~~~          | ~~~           | 188        | 147        | LIP          | ~~~            | ~~~  | ~~~          | ~~~           | 3   |
| HFHS.8     | 331           | LIP          | >500          | 114        | 84         | 59           | ~~~            | ~~~  | LIP          | LIP           | 2   |
| Regular.1  | 83            | 49           | 212           | 62         | 76         | 113          | 34c            | 1.7c | 0            | 42c           | 1   |
| Regular.2  | 52            | 31           | 168           | 100        | 152        | 151          | 21c            | 1.7c | 0            | 34c           | 0   |
| Regular.3  | 98            | 68           | 248           | 67         | 79         | 72           | 30c            | 1.4c | 0            | 50c           | 0   |
| Regular.4  | 111           | 92           | 252           | 87         | 87         | 79           | 19c            | 1.2c | ~~~          | 50c           | 1   |
| Regular.5  | 74            | 43           | 184           | 73         | 96         | 98           | 31c            | 1.7c | 0            | 37c           | 1   |
| Regular.6  | 59            | 32           | 201           | 87         | 113        | 119          | 27c            | 1.8c | 0            | 40c           | 1   |
| Regular.7  | 43            | 23           | 204           | 148        | 127        | 101          | 20c            | 1.8c | ~~~          | 41c           | 0   |
| Regular.8  | 71            | 42           | 198           | 80         | 88         | 85           | 29c            | 1.7c | 0            | 40c           | 0   |
| Regular.9  | 64            | 46           | 232           | 142        | 157        | 88           | 18c            | 1.4c | ~~~          | 46c           | 0   |
| Regular.10 | 49            | 28           | 251           | 123        | 166        | 99           | 21c            | 1.7c | ~~~          | 50c           | 0   |

**Table S2.** Up- and down-regulated pathways in livers pre-challenge organized by disease and function.

| Diseases or Functions Annotation             | p-value  | Predicted Activation State | Activation z-score | # Molecules |
|----------------------------------------------|----------|----------------------------|--------------------|-------------|
| Development of genitourinary system          | 2.07E-11 | Increased                  | 2.114              | 160         |
| Internalization of cells                     | 1.99E-11 | Increased                  | 5.333              | 63          |
| Abnormal bone density                        | 1.99E-11 | Decreased                  | -2.297             | 50          |
| Phagocytosis of blood cells                  | 1.89E-11 | Increased                  | 4.815              | 52          |
| Adhesion of lymphocytes                      | 1.54E-11 | Increased                  | 3.747              | 34          |
| Interaction of T lymphocytes                 | 1.36E-11 | Increased                  | 3.906              | 39          |
| Adhesion of lymphatic system cells           | 1.33E-11 | Increased                  | 3.839              | 35          |
| Cell movement of macrophages                 | 1.32E-11 | Increased                  | 4.236              | 65          |
| Adhesion of tumor cell lines                 | 9.66E-12 | Increased                  | 2.42               | 68          |
| Pancreatobiliary tumor                       | 9.07E-12 | Increased                  | 2.146              | 402         |
| Size of body                                 | 9.03E-12 | Increased                  | 2.966              | 126         |
| Cell cycle progression                       | 8.08E-12 | Increased                  | 2.341              | 171         |
| Binding of T lymphocytes                     | 7.98E-12 | Increased                  | 3.521              | 37          |
| Interaction of lymphocytes                   | 5.70E-12 | Increased                  | 3.973              | 45          |
| Pancreatic lesion                            | 5.57E-12 | Increased                  | 2.114              | 358         |
| Migration of neutrophils                     | 5.56E-12 | Increased                  | 3.941              | 38          |
| Response of myeloid leukocytes               | 5.43E-12 | Increased                  | 2.565              | 34          |
| Chemotaxis of neutrophils                    | 5.10E-12 | Increased                  | 2.328              | 42          |
| Migration of granulocytes                    | 4.82E-12 | Increased                  | 3.2                | 43          |
| Cell-cell contact                            | 4.15E-12 | Increased                  | 2.864              | 136         |
| Development of head                          | 3.98E-12 | Increased                  | 3.325              | 164         |
| Quantity of metal ion                        | 3.75E-12 | Increased                  | 2.912              | 85          |
| Aggregation of blood platelets               | 3.23E-12 | Increased                  | 3.084              | 49          |
| Immune response of antigen presenting cells  | 3.23E-12 | Increased                  | 3.968              | 49          |
| Binding of lymphatic system cells            | 2.58E-12 | Increased                  | 3.801              | 45          |
| Transmigration of leukocytes                 | 2.57E-12 | Increased                  | 2.603              | 42          |
| Binding of lymphocytes                       | 2.47E-12 | Increased                  | 3.619              | 43          |
| Transport of molecule                        | 2.41E-12 | Increased                  | 2.741              | 246         |
| Malignant connective or soft tissue neoplasm | 2.36E-12 | Increased                  | 2.079              | 203         |
| Response of antigen presenting cells         | 1.93E-12 | Increased                  | 4.049              | 52          |
| Recruitment of macrophages                   | 1.92E-12 | Increased                  | 2.61               | 33          |
| Engulfment of cells                          | 1.87E-12 | Increased                  | 4.959              | 99          |
| Phagocytosis                                 | 1.52E-12 | Increased                  | 5.163              | 81          |
| Homing of neutrophils                        | 1.47E-12 | Increased                  | 2.328              | 43          |
| Phagocytosis of cells                        | 1.45E-12 | Increased                  | 5.586              | 75          |
| Binding of endothelial cells                 | 1.13E-12 | Increased                  | 2.496              | 49          |
| Transmigration of cells                      | 1.13E-12 | Increased                  | 2.844              | 49          |
| Cell movement of cancer cells                | 8.81E-13 | Increased                  | 2.68               | 41          |
| Interaction of endothelial cells             | 8.80E-13 | Increased                  | 2.389              | 50          |
| Cellular infiltration by myeloid cells       | 8.74E-13 | Increased                  | 2.023              | 72          |
| Inflammation of respiratory system component | 7.19E-13 | Increased                  | 2.017              | 105         |
| Binding of lymphoid cells                    | 7.09E-13 | Increased                  | 3.713              | 44          |
| Activation of antigen presenting cells       | 6.15E-13 | Increased                  | 3.438              | 70          |
| Homeostasis of blood cells                   | 5.80E-13 | Increased                  | 3.757              | 111         |
| Activation of myeloid cells                  | 4.67E-13 | Increased                  | 3.734              | 74          |
| Degranulation of phagocytes                  | 4.12E-13 | Increased                  | 3.533              | 90          |

|                                         |          |           |        |     |
|-----------------------------------------|----------|-----------|--------|-----|
| Activation of phagocytes                | 3.71E-13 | Increased | 3.826  | 79  |
| Engulfment of myeloid cells             | 3.71E-13 | Increased | 4.655  | 47  |
| Degranulation of myeloid cells          | 3.58E-13 | Increased | 3.647  | 91  |
| Synthesis of reactive oxygen species    | 2.88E-13 | Increased | 4.241  | 99  |
| Homeostasis of leukocytes               | 2.75E-13 | Increased | 3.757  | 110 |
| Malignant neoplasm of retroperitoneum   | 2.37E-13 | Increased | 2.021  | 419 |
| Quantity of Ca2+                        | 2.14E-13 | Increased | 2.613  | 82  |
| Engulfment of leukocytes                | 2.00E-13 | Increased | 4.233  | 51  |
| Recruitment of myeloid cells            | 1.80E-13 | Increased | 4.402  | 64  |
| T cell development                      | 1.58E-13 | Increased | 3.822  | 104 |
| Degranulation of leukocytes             | 1.56E-13 | Increased | 3.4    | 95  |
| Upper gastrointestinal tract tumor      | 1.49E-13 | Increased | 2.236  | 581 |
| Invasion of cells                       | 1.48E-13 | Increased | 4.617  | 184 |
| Engulfment of phagocytes                | 1.43E-13 | Increased | 4.266  | 49  |
| Cell movement of tumor cell lines       | 1.37E-13 | Increased | 4.127  | 185 |
| Metabolism of reactive oxygen species   | 1.34E-13 | Increased | 4.381  | 104 |
| Growth of connective tissue             | 1.31E-13 | Increased | 2.459  | 123 |
| Amyloidosis                             | 1.30E-13 | Decreased | -2.433 | 116 |
| Activation of mononuclear leukocytes    | 1.19E-13 | Increased | 3.257  | 95  |
| Upper gastrointestinal tract cancer     | 1.13E-13 | Increased | 2      | 580 |
| Lymphopoiesis                           | 9.10E-14 | Increased | 3.693  | 123 |
| Adhesion of mononuclear leukocytes      | 7.27E-14 | Increased | 3.616  | 42  |
| Quantity of immunoglobulin              | 6.65E-14 | Increased | 3.038  | 63  |
| Production of antibody                  | 6.01E-14 | Increased | 3.204  | 66  |
| Cell viability                          | 5.81E-14 | Increased | 4.969  | 235 |
| Phagocytosis of phagocytes              | 4.62E-14 | Increased | 4.14   | 46  |
| Phagocytosis of leukocytes              | 4.60E-14 | Increased | 4.229  | 47  |
| Recruitment of antigen presenting cells | 4.55E-14 | Increased | 3.038  | 38  |
| Phagocytosis of myeloid cells           | 3.83E-14 | Increased | 4.396  | 46  |
| Activation of lymphocytes               | 3.64E-14 | Increased | 3.171  | 93  |
| Cell movement of T lymphocytes          | 3.42E-14 | Increased | 3.59   | 63  |
| Recruitment of phagocytes               | 3.01E-14 | Increased | 4.827  | 62  |
| Cell survival                           | 1.69E-14 | Increased | 4.795  | 247 |
| Activation of lymphoid cells            | 1.50E-14 | Increased | 3.25   | 94  |
| Migration of myeloid cells              | 1.43E-14 | Increased | 3.972  | 54  |
| Production of protein                   | 1.43E-14 | Increased | 3.73   | 70  |
| Quantity of B lymphocytes               | 1.29E-14 | Increased | 2.549  | 81  |
| Activation of lymphatic system cells    | 1.09E-14 | Increased | 3.088  | 95  |
| Metastasis                              | 1.03E-14 | Increased | 3.523  | 181 |
| Interaction of mononuclear leukocytes   | 9.60E-15 | Increased | 3.685  | 55  |
| Growth of epithelial tissue             | 7.66E-15 | Increased | 2.312  | 135 |
| Quantity of T lymphocytes               | 7.33E-15 | Increased | 4.155  | 111 |
| T cell homeostasis                      | 7.05E-15 | Increased | 3.667  | 109 |
| Hematopoiesis of mononuclear leukocytes | 6.16E-15 | Increased | 3.759  | 132 |
| Migration of antigen presenting cells   | 4.15E-15 | Increased | 3.735  | 51  |
| Immediate hypersensitivity              | 4.06E-15 | Increased | 2.362  | 77  |
| Response of myeloid cells               | 3.82E-15 | Increased | 4.283  | 60  |
| Immune response of myeloid cells        | 2.85E-15 | Increased | 4.069  | 56  |
| Non-colon gastrointestinal cancer       | 2.59E-15 | Increased | 2      | 612 |
| Aggregation of cells                    | 2.51E-15 | Increased | 3.773  | 77  |
| Extraadrenal retroperitoneal tumor      | 2.51E-15 | Increased | 2.58   | 463 |
| Chemotaxis of myeloid cells             | 2.36E-15 | Increased | 3.493  | 70  |

|                                           |          |           |        |     |
|-------------------------------------------|----------|-----------|--------|-----|
| Leukopoiesis                              | 2.22E-15 | Increased | 4.158  | 149 |
| Aggregation of blood cells                | 1.69E-15 | Increased | 3.56   | 62  |
| Differentiation of mononuclear leukocytes | 1.67E-15 | Increased | 3.796  | 134 |
| Hereditary connective tissue disorder     | 1.43E-15 | Decreased | -3.259 | 128 |
| Binding of mononuclear leukocytes         | 1.33E-15 | Increased | 3.331  | 54  |
| Advanced malignant tumor                  | 8.44E-16 | Increased | 3.434  | 197 |
| Connective tissue tumor                   | 7.45E-16 | Increased | 2.495  | 222 |
| Advanced stage tumor                      | 5.25E-16 | Increased | 3.434  | 198 |
| Chemotaxis of phagocytes                  | 4.47E-16 | Increased | 3.987  | 73  |
| Recruitment of blood cells                | 4.05E-16 | Increased | 4.395  | 79  |
| Connective or soft tissue tumor           | 3.53E-16 | Increased | 2.525  | 249 |
| Degranulation of cells                    | 3.26E-16 | Increased | 3.573  | 115 |
| Recruitment of leukocytes                 | 2.92E-16 | Increased | 4.208  | 78  |
| Chemotaxis of leukocytes                  | 2.63E-16 | Increased | 4.146  | 84  |
| Immune response of phagocytes             | 2.22E-16 | Increased | 4.017  | 62  |
| Growth of tumor                           | 2.05E-16 | Increased | 4.005  | 179 |
| Degranulation                             | 1.09E-16 | Increased | 3.507  | 117 |
| Inflammation of joint                     | 1.07E-16 | Increased | 3.397  | 178 |
| Response of phagocytes                    | 9.69E-17 | Increased | 4.268  | 66  |
| Chemotaxis of blood cells                 | 9.45E-17 | Increased | 4.147  | 85  |
| Recruitment of cells                      | 8.37E-17 | Increased | 4.692  | 85  |
| T cell migration                          | 7.55E-17 | Increased | 4.271  | 73  |
| Immune response of leukocytes             | 7.50E-17 | Increased | 4.727  | 80  |
| Hypersensitive reaction                   | 6.65E-17 | Increased | 3.831  | 97  |
| Vasculogenesis                            | 5.92E-17 | Increased | 3.35   | 158 |
| Angiogenesis                              | 5.56E-17 | Increased | 4.04   | 184 |
| Development of vasculature                | 4.93E-17 | Increased | 3.955  | 198 |
| Binding of tumor cell lines               | 4.04E-17 | Increased | 2.518  | 93  |
| Homing of leukocytes                      | 3.51E-17 | Increased | 4.4    | 89  |
| Cell movement of antigen presenting cells | 2.39E-17 | Increased | 4.024  | 91  |
| Binding of myeloid cells                  | 2.30E-17 | Increased | 3.053  | 60  |
| Cellular homeostasis                      | 2.19E-17 | Increased | 4.676  | 269 |
| Experimental autoimmune encephalomyelitis | 1.82E-17 | Increased | 3.58   | 86  |
| Homing of blood cells                     | 1.80E-17 | Increased | 4.405  | 90  |
| Interaction of tumor cell lines           | 1.57E-17 | Increased | 2.283  | 96  |
| Microtubule dynamics                      | 6.51E-18 | Increased | 3.927  | 216 |
| Cell movement of granulocytes             | 5.63E-18 | Increased | 3.593  | 93  |
| Cell movement of lymphatic system cells   | 2.90E-18 | Increased | 4.135  | 101 |
| Organization of cytoplasm                 | 2.90E-18 | Increased | 4.437  | 262 |
| Cell movement of neutrophils              | 2.55E-18 | Increased | 3.635  | 83  |
| Encephalitis                              | 2.39E-18 | Increased | 2.541  | 95  |
| Immune response of cells                  | 1.57E-18 | Increased | 4.854  | 130 |
| Cell movement of lymphocytes              | 1.14E-18 | Increased | 4.249  | 100 |
| Allergy                                   | 5.20E-19 | Increased | 3.26   | 98  |
| Rheumatic Disease                         | 4.02E-19 | Increased | 3.322  | 223 |
| Organismal death                          | 3.96E-19 | Decreased | -4.3   | 362 |
| Morbidity or mortality                    | 2.66E-19 | Decreased | -4.307 | 366 |
| Cell proliferation of T lymphocytes       | 2.10E-19 | Increased | 2.415  | 127 |
| Development of body trunk                 | 1.36E-19 | Increased | 3.651  | 215 |
| Binding of professional phagocytic cells  | 1.35E-19 | Increased | 2.925  | 61  |
| Inflammation of central nervous system    | 1.33E-19 | Increased | 2.333  | 102 |

|                                         |          |           |       |      |
|-----------------------------------------|----------|-----------|-------|------|
| Invasive tumor                          | 1.09E-19 | Increased | 3.538 | 224  |
| Migration of lymphatic system cells     | 8.48E-20 | Increased | 4.544 | 95   |
| Lymphocyte migration                    | 5.97E-20 | Increased | 4.62  | 94   |
| Organization of cytoskeleton            | 5.36E-20 | Increased | 4.437 | 249  |
| Chemotaxis                              | 4.82E-20 | Increased | 4.815 | 123  |
| Migration of mononuclear leukocytes     | 3.71E-20 | Increased | 4.931 | 99   |
| Proliferation of lymphocytes            | 3.65E-20 | Increased | 3.292 | 150  |
| Proliferation of immune cells           | 3.58E-20 | Increased | 3.303 | 158  |
| Proliferation of lymphatic system cells | 3.30E-20 | Increased | 3.653 | 159  |
| Homing of cells                         | 2.85E-20 | Increased | 4.933 | 128  |
| Interaction of phagocytes               | 2.61E-20 | Increased | 3.318 | 64   |
| Quantity of lymphatic system cells      | 1.12E-20 | Increased | 4.27  | 161  |
| Proliferation of blood cells            | 8.94E-21 | Increased | 2.84  | 172  |
| Migration of phagocytes                 | 7.21E-21 | Increased | 5.059 | 82   |
| Proliferation of mononuclear leukocytes | 3.68E-21 | Increased | 3.384 | 154  |
| Quantity of lymphocytes                 | 1.41E-21 | Increased | 4.164 | 155  |
| Cell movement of mononuclear leukocytes | 7.82E-22 | Increased | 4.793 | 119  |
| Quantity of lymphoid cells              | 7.71E-22 | Increased | 4.267 | 156  |
| Cell movement of myeloid cells          | 9.41E-23 | Increased | 5.148 | 136  |
| Atherosclerosis                         | 5.83E-23 | Increased | 2.673 | 111  |
| Arteriosclerosis                        | 5.55E-23 | Increased | 2.673 | 112  |
| Cancer of cells                         | 5.08E-23 | Increased | 2.324 | 684  |
| Occlusion of artery                     | 8.44E-24 | Increased | 2.291 | 124  |
| Activation of leukocytes                | 7.41E-24 | Increased | 3.906 | 152  |
| Quantity of mononuclear leukocytes      | 3.21E-24 | Increased | 4.23  | 166  |
| Development of digestive organ tumor    | 2.85E-24 | Increased | 2.223 | 805  |
| Occlusion of blood vessel               | 1.78E-24 | Increased | 2.439 | 127  |
| Cell movement of phagocytes             | 2.32E-25 | Increased | 5.16  | 143  |
| Vaso-occlusion                          | 1.80E-25 | Increased | 2.762 | 130  |
| Inflammatory response                   | 5.12E-26 | Increased | 4.721 | 179  |
| Neoplasia of cells                      | 4.32E-26 | Increased | 3.343 | 764  |
| Nervous system neoplasm                 | 1.09E-26 | Increased | 2.631 | 863  |
| Binding of leukocytes                   | 6.17E-27 | Increased | 4.377 | 107  |
| Adhesion of immune cells                | 3.52E-27 | Increased | 4.659 | 102  |
| Activation of blood cells               | 2.67E-27 | Increased | 4.18  | 171  |
| Binding of blood cells                  | 1.99E-28 | Increased | 4.151 | 117  |
| Activation of cells                     | 1.77E-28 | Increased | 4.235 | 212  |
| Adhesion of blood cells                 | 1.50E-29 | Increased | 4.576 | 110  |
| Cell movement of leukocytes             | 2.69E-31 | Increased | 5.68  | 193  |
| Leukocyte migration                     | 2.22E-31 | Increased | 6.163 | 217  |
| Quantity of cells                       | 2.80E-32 | Increased | 4.371 | 346  |
| Migration of cells                      | 2.28E-33 | Increased | 5.915 | 387  |
| Quantity of leukocytes                  | 8.59E-34 | Increased | 3.627 | 215  |
| Quantity of blood cells                 | 1.14E-34 | Increased | 3.879 | 234  |
| Cell movement                           | 1.12E-34 | Increased | 6.237 | 422  |
| Digestive organ tumor                   | 2.14E-45 | Increased | 2.245 | 1243 |
| Intraabdominal organ tumor              | 1.16E-50 | Increased | 2.485 | 1285 |
| Cancer                                  | 3.98E-60 | Increased | 3.984 | 1378 |
| Solid tumor                             | 1.91E-61 | Increased | 2.377 | 1380 |
| Malignant solid tumor                   | 6.41E-62 | Increased | 2.227 | 1377 |
| Non-melanoma solid tumor                | 2.74E-65 | Increased | 2.163 | 1366 |

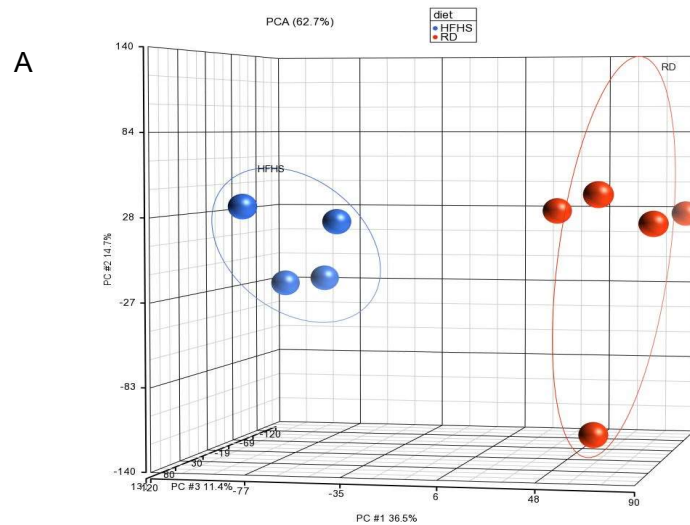

**Figure S1. A.** RNA was isolated for gene expression analyses from liver tissue at 16 weeks and principal component analysis performed. Colors refer to legend on top. Abbreviations: RD = regular diet, HFHS = high-fat high-sugar, PC = principal component.

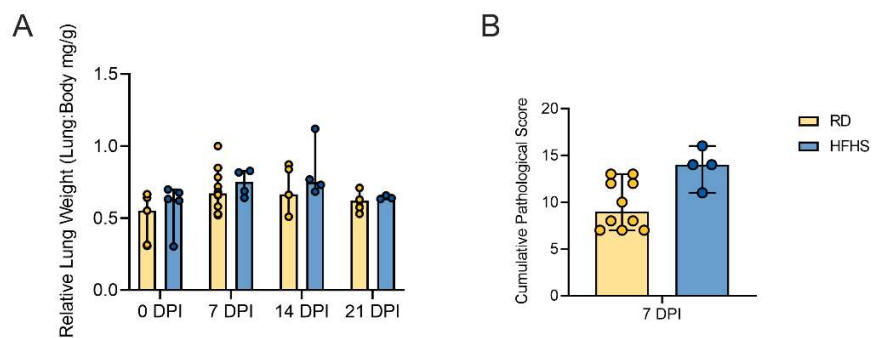

**Figure S2.** Male Syrian hamsters were fed either a regular or high-fat high-sugar *diet ad libitum* for 16 weeks, then challenged with  $8 \times 10^4$  TCID<sub>50</sub> SARS-CoV-2. Animals were euthanized pre-challenge (0 DPI), at 7, 14 and 21 DPI. **A.** Lung weights. Bar chart graphs depicting median, 95% CI and individuals. **B.** Cumulative pathology score of lung tissues collected at 7 DPI. Truncated violin plots depicting median, quartiles and individuals, N = 10 (RD) / 4 (HFHS), HFHS = yellow, RD = blue. Abbreviations: RD = regular diet, HFHS = high-fat high-sugar. p-values are indicated were appropriate.

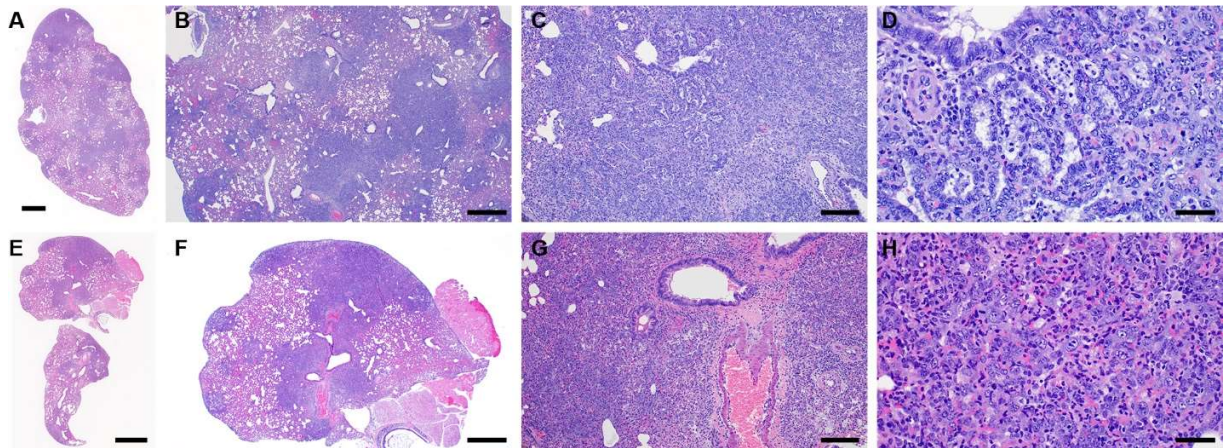

**Figure S3.** Male Syrian hamsters were fed either a regular or high-fat high-sugar *diet ad libitum* for 16 weeks, then challenged with  $8 \times 10^4$  TCID<sub>50</sub> SARS-CoV-2. Animals were euthanized at day 8 and 9 due to increased weight loss. **A, E.** Dark, discrete foci identify areas of pneumonia; lighter areas indicate hemorrhage, edema, inflammation. HE, 1.4x. **B, F.** Although approximately 100% of the lobe is affected, only 50% contains discrete foci of interstitial pneumonia, HE, 20x. **C, D.** Examples of organized type II pneumocyte hyperplasia giving a honeycomb appearance. HE, 100x, 400x. **G, H.** Less well-organized foci with more congestion, edema, and inflammation. HE, 100x, 400x. Of note, both appearances overlap and can be present in the same animal.



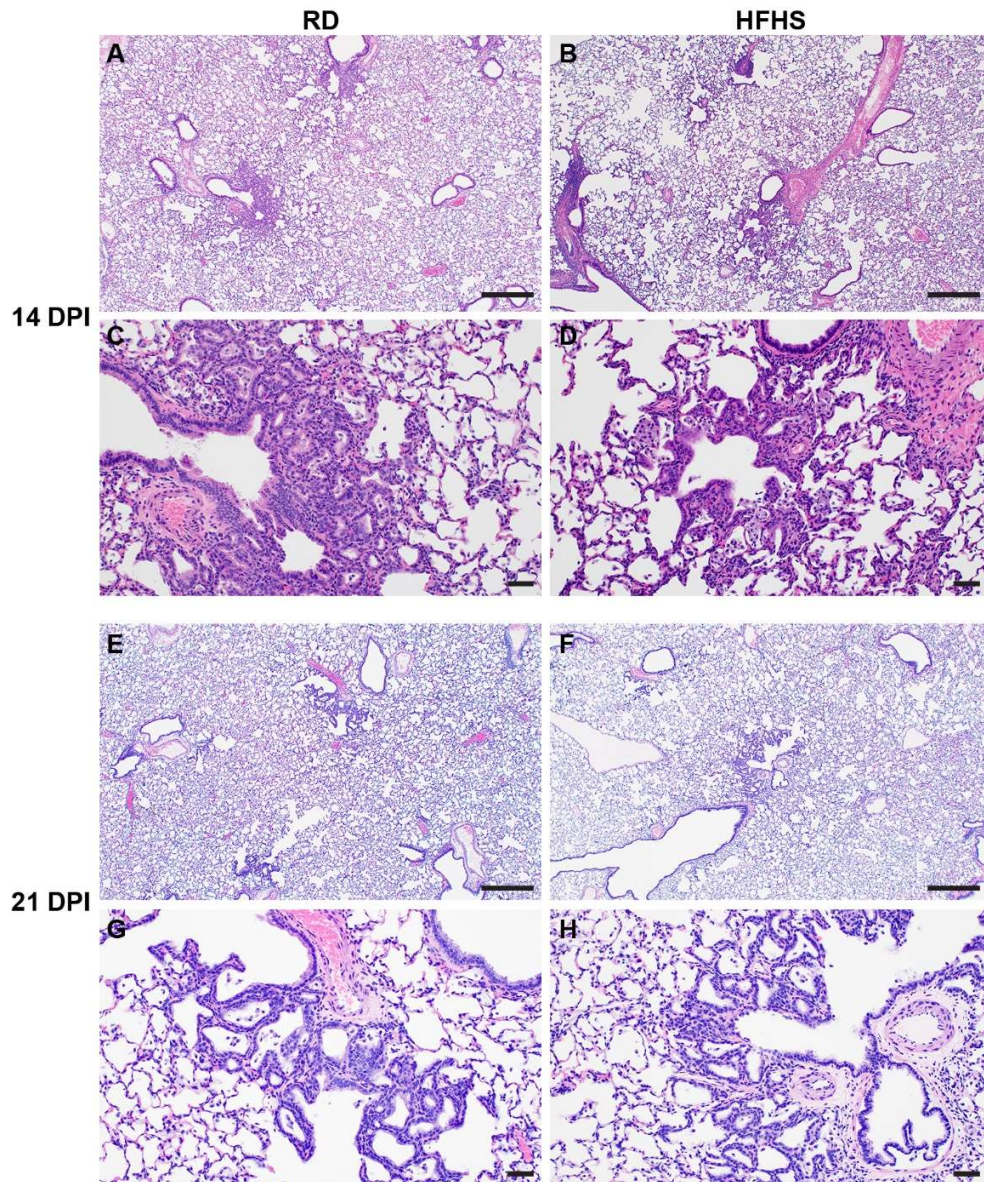

**Figure S4.** Male Syrian hamsters were fed either a regular or high-fat high-sugar *diad libitum* for 16 weeks, then challenged with  $8 \times 10^4$  TCID<sub>50</sub> SARS-CoV-2. Lung tissues were collected 14 and 21 days post inoculation. **A, B.** 14 DPI, Lesions located at terminal bronchioles. HE, 40x. **C, D.** 14 DPI, Thickened septa, alveolar bronchiolization and minimal inflammation. HE, 400x. **E, F.** 21 DPI, Lesions appear indistinguishable. HE, 40x. **G, H.** 21 DPI, Thickened septa and alveolar bronchiolization remain. HE, 400x. Abbreviations: Reg = regular diet, HFHS = high-fat high-sugar, DPI = days post inoculation.



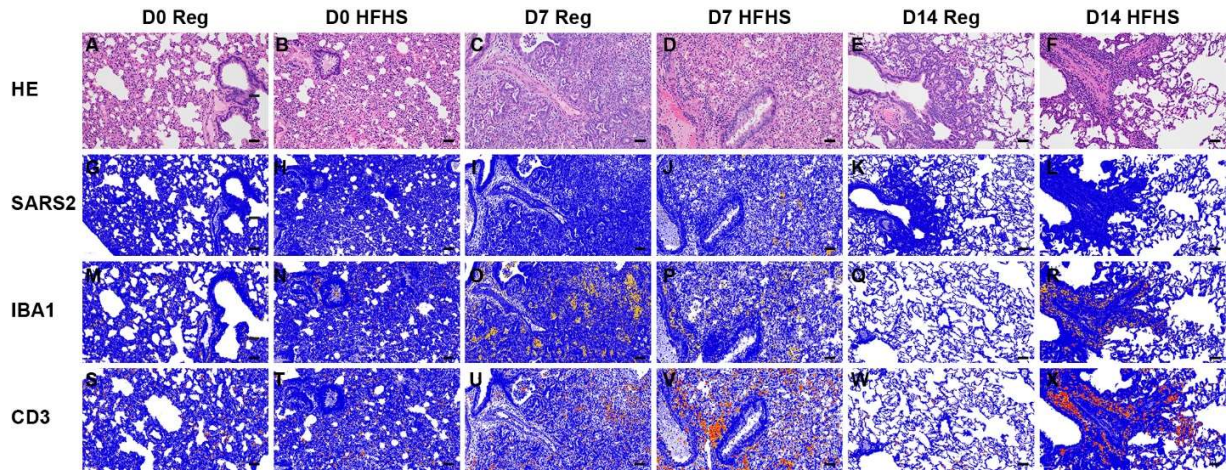

**Figure S5.** Male Syrian hamsters were fed either a regular or high-fat high-sugar *diet ad libitum* for 16 weeks, then challenged with  $8 \times 10^4$  TCID<sub>50</sub> SARS-CoV-2. Animals were euthanized pre-challenge (0 DPI), 7- and 14-days post inoculation. Serial images of lungs. **A-F.** Pre-challenge lungs appear normal, 7 DPI lungs are pneumonic, and 14 DPI lungs appear to be resolving. HE, 200x. **G-L.** Positive pixel image of IHC staining against N protein of SARS-CoV-2. Note the positive pixels at 7 DPI in the HFHS image, 200x. **M-P.** Positive pixel image of IHC staining against IBA1. Note the increase in positive pixels at 7 and 14 DPI for both the RD and HFHS samples, 200x. **Q-X.** Positive pixel image of IHC staining against CD3, Note the increase in positive pixels at 7 and 14 DPI for both the RD and HFHS samples, 200x. Positive pixel = orange. Abbreviations: Reg = regular diet, HFHS = high-fat high-sugar, DPI = days post inoculation.
